# Supplementary material for: Isolation and Characterization of Antimicrobial Metabolites from the Sophora tonkinensis-Associated Fungus Penicillium sp. GDGJ-N37
Source: MDPI journal article supplement (doi:10.3390/molecules29020348), 2024-01-10
Supplement: s1 [file s1]

## **Supplementary materials**

### **Isolation and Characterization of Antimicrobial Metabolites from the *Sophora tonkinensis*-Associated Fungus *Penicillium* sp. GDGJ-N37**

**Lili Huang, Yongxia Li, Jing Pang, Liuxia Lv, Jiatong Zhou, Liqi Liang, Xianhua He, Jun Li, Weifeng Xu \* and Ruiyun Yang \***

State Key Laboratory for Chemistry and Molecular Engineering of Medicinal Resources, School of Chemistry and Pharmaceutical Sciences, Guangxi Normal University, Guilin 541004, China

#### **Corresponding Author**

\*E-mail: yxuweifeng\_u@mailbox.gxnu.edu.cn (W.X.);

yang\_rui\_yun@mailbox.gxnu.edu.cn (R.Y.)

**ABSTRACT:** Chemical investigation of *Penicillium* sp. GDGJ-N37, a *Sophora tonkinensis*-associated fungus, yielded two new azaphilone derivatives, N-isoamylsclerotiorinamine (**1**) and 7-methoxyl-N-isoamylsclerotiorinamine (**2**), and four known azaphilones (**3–6**), together with two new chromone derivatives, penithochromones X and Y (**7** and **8**). Their structures were elucidated based on spectroscopic data, CD spectrum, and semi-synthesis. Sclerotioramine (**3**) showed significant antibacterial activities against *B. subtilis* and *S. dysentery*, and it also showed most potent anti-plant pathogenic fungi activities against *P. theae*, *C. miyabeanus*, and *E. turcicum*.

**KEYWORDS:** *Sophora tonkinensis*; *Penicillium* sp.; azaphilone derivatives; antibacterial activities; antifungal activities.

## List of supporting information

Spectroscopic data of compounds **3–6**

**Table S1.** Antibacterial activities of compounds **1–12** (MIC,  $\mu\text{g/mL}$ )

**Table S2.** Antifungal activities of compounds **1–8**, and **10–12** (MIC,  $\mu\text{g/mL}$ )

**Figure S1.** HR-ESI-MS spectrum of compound **1**

**Figure S2.**  $^1\text{H}$  NMR (400 MHz,  $\text{CD}_3\text{OD}$ ) spectrum of compound **1**

**Figure S3.**  $^{13}\text{C}$  NMR (100 MHz,  $\text{CD}_3\text{OD}$ ) spectrum of compound **1**

**Figure S4.** HMQC ( $\text{CD}_3\text{OD}$ ) spectrum of compound **1**

**Figure S5.**  $^1\text{H}$ - $^1\text{H}$  COSY ( $\text{CD}_3\text{OD}$ ) spectrum of compound **1**

**Figure S6.** HMBC ( $\text{CD}_3\text{OD}$ ) spectrum of compound **1**

**Figure S7.** HR-ESI-MS spectrum of compound **2**

**Figure S8.**  $^1\text{H}$  NMR (600 MHz,  $\text{CD}_3\text{OD}$ ) spectrum of compound **2**

**Figure S9.**  $^{13}\text{C}$  NMR (150 MHz,  $\text{CD}_3\text{OD}$ ) spectrum of compound **2**

**Figure S10.** HMQC ( $\text{CD}_3\text{OD}$ ) spectrum of compound **2**

**Figure S11.**  $^1\text{H}$ - $^1\text{H}$  COSY ( $\text{CD}_3\text{OD}$ ) spectrum of compound **2**

**Figure S12.** HMBC ( $\text{CD}_3\text{OD}$ ) spectrum of compound **2**

**Figure S13.** HR-ESI-MS spectrum of compound **7**

**Figure S14.**  $^1\text{H}$  NMR (400 MHz,  $\text{CDCl}_3$ ) spectrum of compound **7**

**Figure S15.**  $^{13}\text{C}$  NMR (100 MHz,  $\text{CDCl}_3$ ) spectrum of compound **7**

**Figure S16.** HMQC ( $\text{CDCl}_3$ ) spectrum of compound **7**

**Figure S17.**  $^1\text{H}$ - $^1\text{H}$  COSY ( $\text{CDCl}_3$ ) spectrum of compound **7**

**Figure S18.** HMBC ( $\text{CDCl}_3$ ) spectrum of compound **7**

**Figure S19.** HR-ESI-MS spectrum of compound **8**

**Figure S20.**  $^1\text{H}$  NMR (400 MHz,  $\text{DMSO-}d_6$ ) spectrum of compound **8**

**Figure S21.**  $^{13}\text{C}$  NMR (100 MHz,  $\text{DMSO-}d_6$ ) spectrum of compound **8**

**Figure S22.** HMQC ( $\text{DMSO-}d_6$ ) spectrum of compound **8**

**Figure S23.**  $^1\text{H}$ - $^1\text{H}$  COSY ( $\text{DMSO-}d_6$ ) spectrum of compound **8**

**Figure S24.** HMBC ( $\text{DMSO-}d_6$ ) spectrum of compound **8**

## Spectroscopic data of compounds 3–6

**Sclerotioramine (3):** red amorphous powder; HRESIMS  $m/z$  412.1290  $[M + Na]^+$  (calcd. for  $C_{21}H_{24}ClNO_4Na^+$ , 412.1286).  $^1H$  NMR (400 MHz,  $CD_3OD$ )  $\delta_H$  8.03 (1H, s, H-1), 7.17 (1H, d,  $J = 16.2$  Hz, H-10), 7.10 (1H, s, H-4), 6.24 (1H, d,  $J = 16.2$  Hz, H-9), 5.72 (1H, d,  $J = 9.7$  Hz, H-12), 2.55 (1H, m, H-13), 2.12 (3H, s, H-20), 1.91 (3H, d,  $J = 1.2$  Hz, H-17), 1.51 (3H, s, H-18), 1.46 (1H, m, H-14a), 1.34 (1H, m, H-14b), 1.03 (3H, d,  $J = 6.6$  Hz, H-16), 0.89 (1H, t,  $J = 7.4$  Hz, H-15).  $^{13}C$  NMR (100 MHz,  $CD_3OD$ )  $\delta_C$ , 195.1 (C-8), 184.0 (C-6), 171.6 (C-19), 149.3 (C-4a), 148.9 (C-12), 148.0 (C-3), 143.3 (C-10), 139.6 (C-1), 133.8 (C-11), 118.4 (C-9), 115.7 (C-8a), 112.4 (C-4), 101.9 (C-5), 86.1 (C-7), 36.2 (C-13), 31.2 (C-14), 23.9 (C-18), 20.6 (C-16), 20.2 (C-20), 12.5 (C-17), 12.3 (C-15).

**Isochromophilone VI (4):** red amorphous powder; HRESIMS  $m/z$  434.1733  $[M + H]^+$  (calcd. for  $C_{23}H_{29}ClNO_5Na^+$ , 434.1734).  $^1H$  NMR (400 MHz,  $CD_3OD$ )  $\delta_H$  8.16 (1H, s, H-1), 7.18 (1H, s, H-4), 7.10 (1H, d,  $J = 15.4$  Hz, H-10), 6.56 (1H, d,  $J = 15.4$  Hz, H-9), 5.78 (1H, d,  $J = 9.8$  Hz, H-12), 4.24 (2H, dd,  $J = 5.2, 4.8$  Hz, H-1'), 3.92 (2H, t,  $J = 5.0$  Hz, H-2'), 2.55 (1H, m, H-13), 2.12 (3H, s, H-20), 1.92 (3H, d,  $J = 1.2$  Hz, H-17), 1.51 (3H, s, H-18), 1.46 (1H, m, H-14a), 1.34 (1H, m, H-14b), 1.04 (3H, d,  $J = 6.6$  Hz, H-16), 0.90 (3H, t,  $J = 7.4$  Hz, H-15).  $^{13}C$  NMR (100 MHz,  $CD_3OD$ )  $\delta_C$ , 195.1 (C-8), 185.5 (C-6), 171.5 (C-19), 151.9 (C-5), 148.8 (C-12), 148.4 (C-3), 146.5 (C-10), 144.5 (C-1), 133.9 (C-11), 117.2 (C-9), 116.3 (C-8a), 112.6 (C-4), 101.2 (C-4a), 86.2 (C-7), 61.1 (C-2'), 57.5 (C-1'), 36.2 (C-13), 31.2 (C-14), 23.8 (C-18), 20.6 (C-16), 20.2 (C-20), 12.7 (C-17), 12.4 (C-15).

**Sclerotiorin (5):** yellow amorphous powder;  $^1H$  NMR (400 MHz,  $CD_3OD$ )  $\delta_H$  8.19 (1H, s, H-1), 7.18 (1H, d,  $J = 15.7$  Hz, H-10), 6.87 (1H, s, H-4), 6.37 (1H, d,  $J = 15.7$  Hz, H-9), 5.74 (1H, d,  $J = 9.8$  Hz, H-12), 2.54 (1H, m, H-13), 2.12 (3H, s, H-19), 1.89 (3H, d,  $J = 1.2$  Hz, H-17), 1.54 (3H, s, H-18), 1.47 (1H, s, H-14a), 1.35 (1H, m, H-14b), 1.02 (3H, d,  $J = 6.6$  Hz, H-16), 0.88 (3H, t,  $J = 7.3$  Hz, H-15).

**Hypocrellone A (6):** yellow oil; HRESIMS  $m/z$  429.1676  $[M + H]^+$  (calcd. for  $C_{21}H_{30}ClNO_7^+$ , 429.1675).  $^1H$  NMR (400 MHz,  $CD_3OD$ )  $\delta_H$  6.75 (1H, d,  $J = 15.6$  Hz, H-10), 6.27 (1H, d,  $J = 15.6$  Hz, H-9), 6.11 (1H, s, H-4), 5.47 (1H, d,  $J = 2.9$  Hz, H-8), 4.53 (1H, dd,  $J = 10.6, 4.9$  Hz, H-1 $\alpha$ ), 3.79 (1H, dd,  $J = 13.0, 10.6$  Hz, H-1 $\beta$ ), 3.44 (1H, m, H-8a), 3.42 (1H, d,  $J = 2.2$  Hz, H-12), 2.02 (3H, s, H-20), 1.72 (1H, m, H-13), 1.44 (1H, m, H-14 $\alpha$ ), 1.42 (3H, s, H-18), 1.31 (3H, s, H-17), 1.26 (1H, m, H-14 $\beta$ ), 0.90 (3H, t,  $J = 7.4$  Hz, H-15), 0.84 (3H, d,  $J = 6.8$  Hz, H-16).  $^{13}C$  NMR (100 MHz,  $CD_3OD$ )  $\delta_C$  193.7 (C-6), 172.3 (C-19), 163.2 (C-3), 145.8 (C-4a), 145.6 (C-10), 122.4 (C-9), 118.3 (C-5), 102.3 (C-4), 81.0 (C-12), 77.5 (C-11), 76.9 (C-8), 76.8 (C-7), 68.6 (C-1), 38.0 (C-8a), 36.1 (C-13), 30.0 (C-14), 26.5 (C-17), 24.1 (C-18), 20.6 (C-20), 14.3 (C-16), 12.2 (C-15).

**Penithochromone F (9):** light white solid; HRESIMS  $m/z$  349.1631  $[M + H]^+$  (calcd. for  $C_{19}H_{25}O_6^+$ , 349.1646).  $^1H$  NMR (400 MHz, acetone- $d_6$ )  $\delta_H$  6.56 (1H, d,  $J = 2.3$  Hz, H-8), 6.44 (1H, d,  $J = 2.3$  Hz, H-6), 5.89 (1H, s, H-3), 3.91 (3H, s, 7-OCH<sub>3</sub>), 3.85 (3H, s, 5-OCH<sub>3</sub>), 3.65 (3H, s, 14-OCH<sub>3</sub>), 2.56 (2H, t,  $J = 7.4$  Hz, H-9), 2.30 (2H, t,  $J = 7.4$  Hz, H-14), 1.72 (2H, m, H-10), 1.61 (2H, m, H-13), 1.42 (2H, m, H-12), 1.40 (2H, m, H-11).  $^{13}C$  NMR (100 MHz, acetone- $d_6$ )  $\delta_C$  176.5 (C-4), 174.1 (C-14), 166.9 (C-2), 164.8 (C-7), 161.8 (C-5), 161.0 (C-8a), 111.7 (C-3), 109.6 (C-4a), 96.6 (C-6), 93.6 (C-8), 56.4 (5-OCH<sub>3</sub>), 56.2 (14-OCH<sub>3</sub>), 51.5 (7-OCH<sub>3</sub>), 34.2 (C-9), 33.8 (C-14), 30.3 (C-11), 29.4 (C-12), 27.2 (C-10), 25.4 (C-13).

**Table S1.** Antibacterial activities of compounds **1–12** (MIC,  $\mu\text{g/mL}$ ).

| Compounds     | <i>S. aureus</i> | <i>B. subtilis</i> | <i>E. coli</i> | <i>B. megaterium</i> | <i>S. dysentery</i> |
|---------------|------------------|--------------------|----------------|----------------------|---------------------|
| <b>1</b>      | I                | I                  | I              | I                    | I                   |
| <b>2</b>      | I                | I                  | I              | I                    | I                   |
| <b>3</b>      | 12.5             | 3.125              | I              | 3.125                | 6.25                |
| <b>4</b>      | 25               | 50                 | I              | 25                   | 50                  |
| <b>5</b>      | I                | 100                | I              | I                    | I                   |
| <b>6</b>      | 100              | I                  | I              | 50                   | I                   |
| <b>7</b>      | I                | I                  | I              | I                    | I                   |
| <b>8</b>      | I                | I                  | I              | I                    | I                   |
| <b>9</b>      | I                | I                  | I              | I                    | I                   |
| <b>10</b>     | I                | I                  | I              | I                    | I                   |
| <b>11</b>     | 50               | 50                 | I              | –                    | I                   |
| <b>12</b>     | I                | I                  | I              | I                    | I                   |
| Ciprofloxacin | 25               | 0.78               | 6.25           | 6.25                 | 6.25                |

I: Inactive at the concentration of 100  $\mu\text{g/mL}$ .**Table S2.** Antifungal activities of compounds **1–8**, and **10–12** (MIC,  $\mu\text{g/mL}$ ).

| Compounds   | <i>A. citri</i> | <i>A. oleracea</i> | <i>P. theae</i> | <i>C. miyabeanus</i> | <i>E. turcicum</i> |
|-------------|-----------------|--------------------|-----------------|----------------------|--------------------|
| <b>1</b>    | I               | I                  | I               | I                    | I                  |
| <b>2</b>    | I               | I                  | I               | I                    | I                  |
| <b>3</b>    | 12.5            | 25                 | 6.25            | 6.25                 | 3.125              |
| <b>4</b>    | 25              | I                  | 25              | 50                   | 100                |
| <b>5</b>    | 50              | 100                | 50              | 6.25                 | 12.5               |
| <b>6</b>    | 50              | 50                 | I               | I                    | I                  |
| <b>7</b>    | I               | I                  | I               | I                    | I                  |
| <b>8</b>    | I               | I                  | I               | I                    | I                  |
| <b>10</b>   | I               | I                  | I               | I                    | I                  |
| <b>11</b>   | I               | I                  | I               | I                    | I                  |
| <b>12</b>   | 50              | 25                 | 50              | I                    | I                  |
| Carbendazim | 50              | 50                 | 50              | 50                   | 6.25               |

I: Inactive at the concentration of 100  $\mu\text{g/mL}$ .

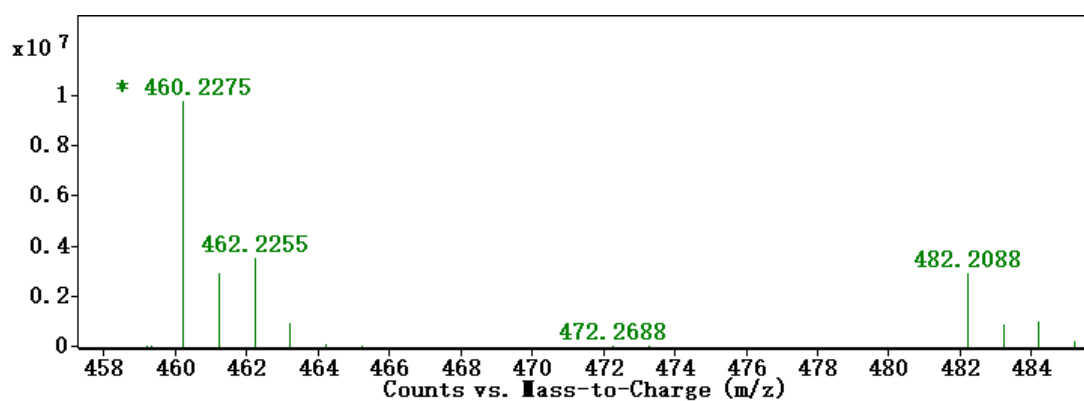

Figure S1. HR-ESI-MS spectrum of compound 1

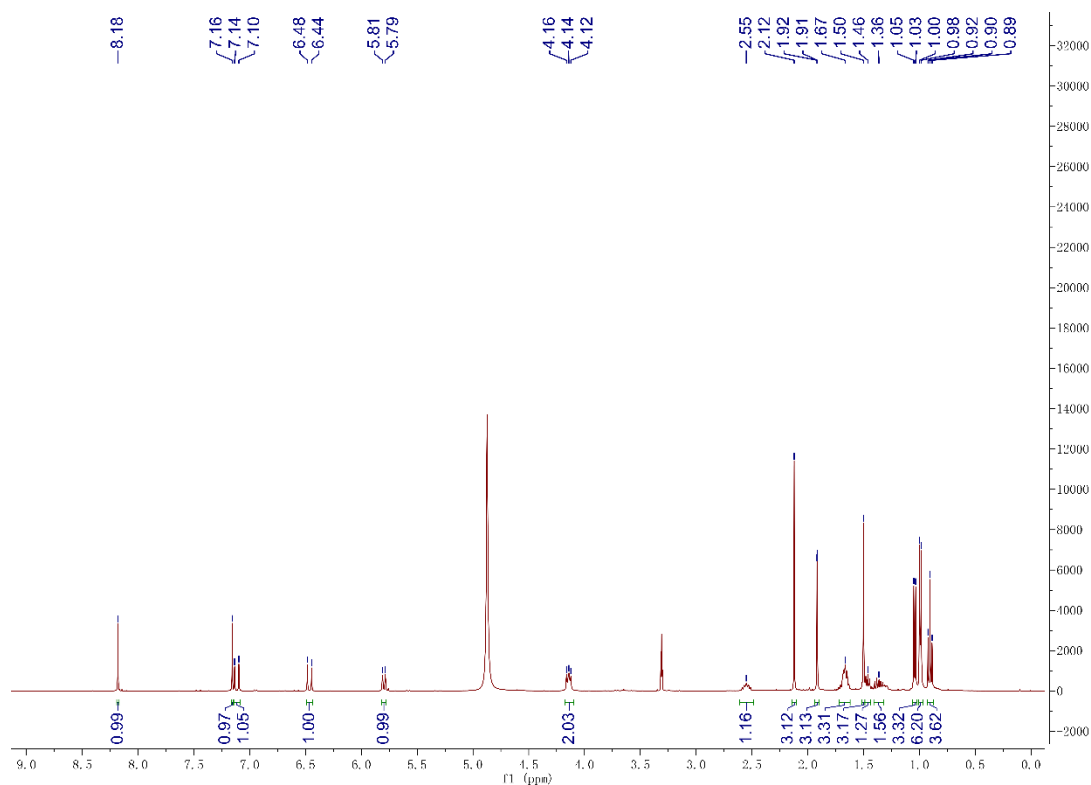

Figure S2.  $^1\text{H}$  NMR (400 MHz,  $\text{CD}_3\text{OD}$ ) spectrum of compound 1

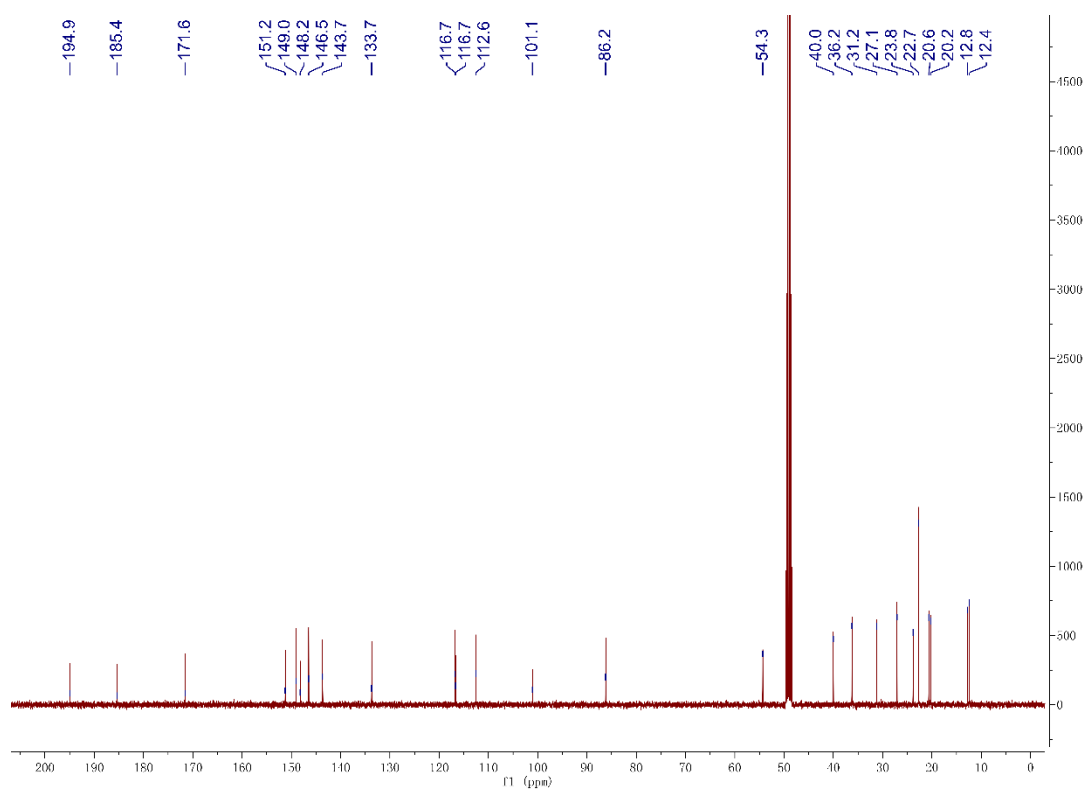

**Figure S3.**  $^{13}\text{C}$  NMR (100 MHz,  $\text{CD}_3\text{OD}$ ) spectrum of compound **1**

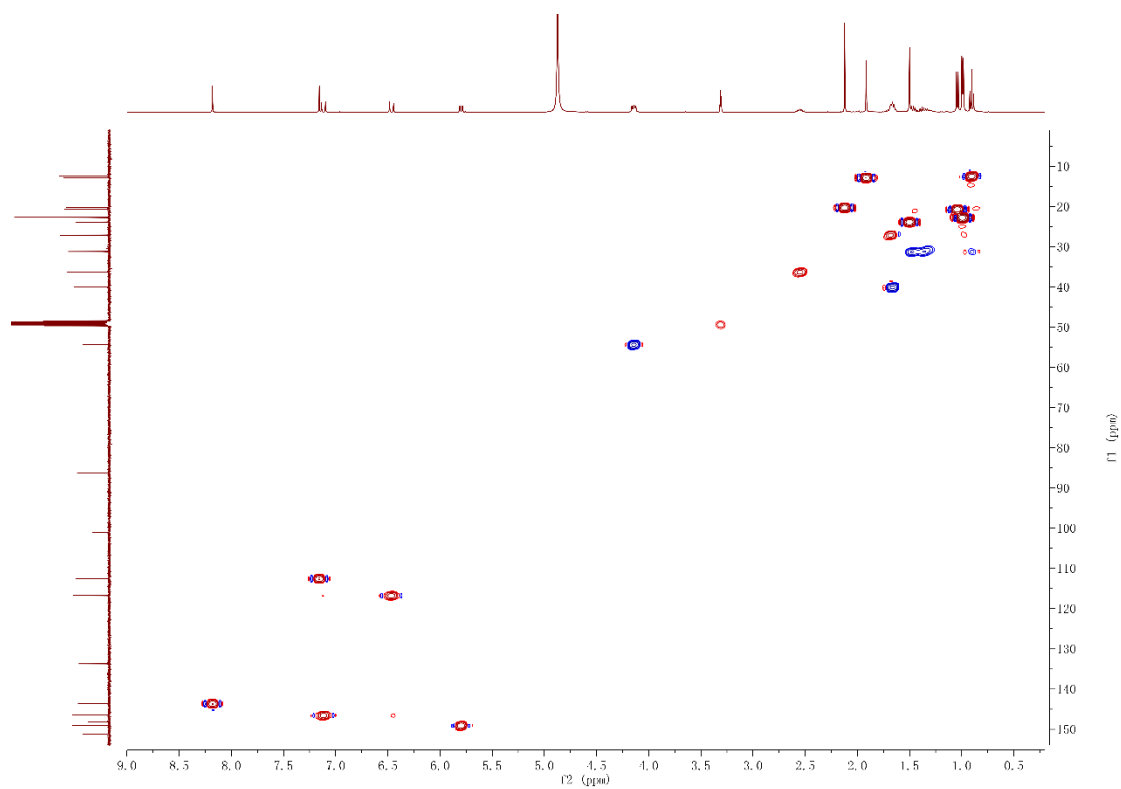

**Figure S4.** HMQC ( $\text{CD}_3\text{OD}$ ) spectrum of compound **1**

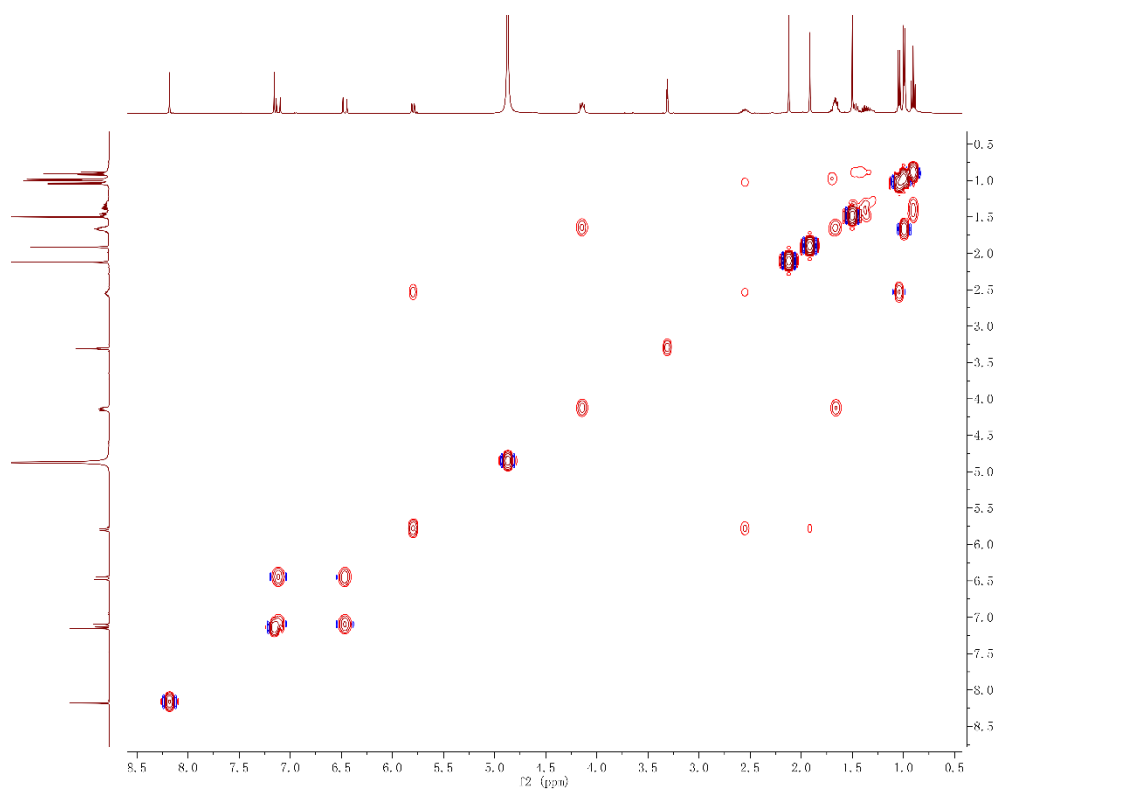

**Figure S5.**  $^1\text{H}$ - $^1\text{H}$  COSY ( $\text{CD}_3\text{OD}$ ) spectrum of compound **1**

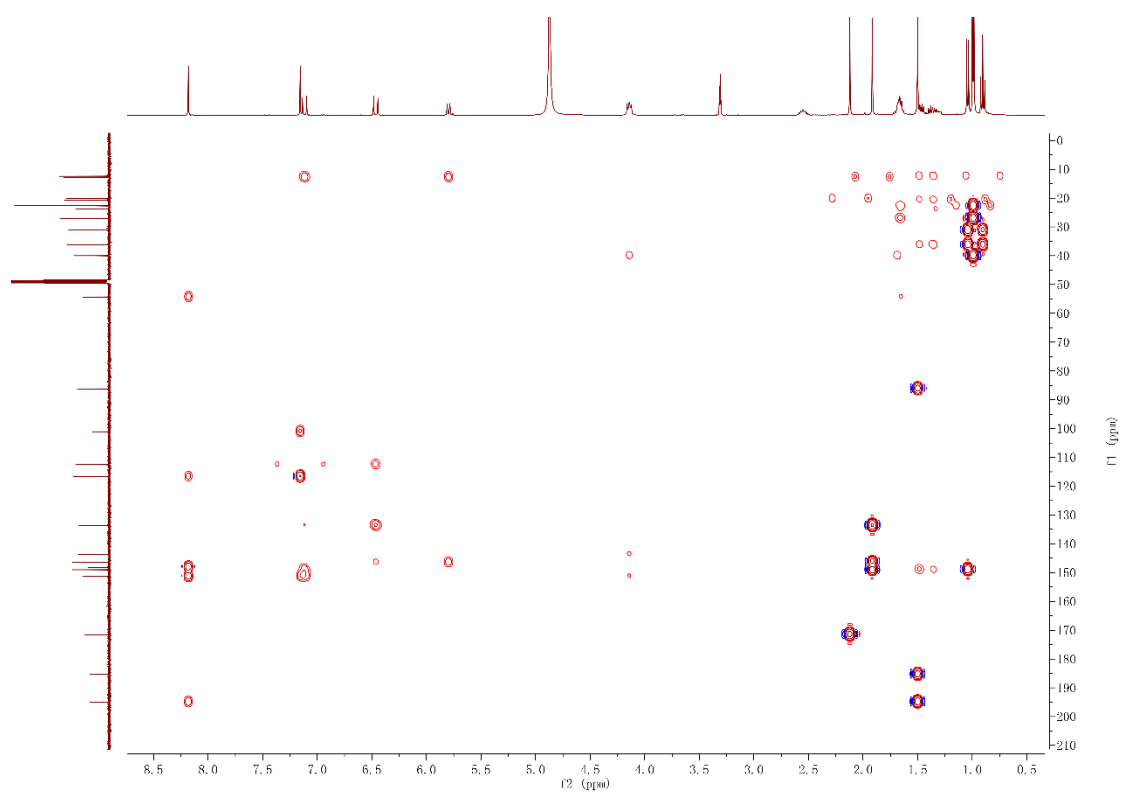

**Figure S6.** HMBC ( $\text{CD}_3\text{OD}$ ) spectrum of compound **1**



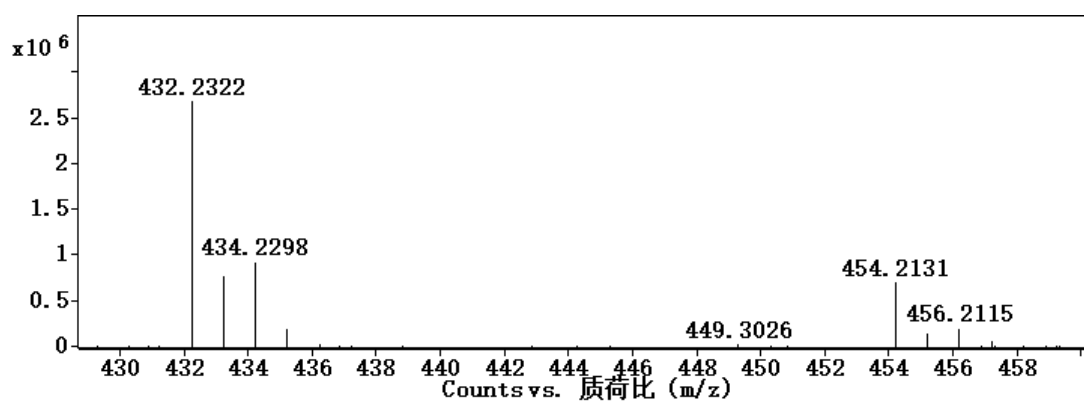

Figure S7. HR-ESI-MS spectrum of compound 2

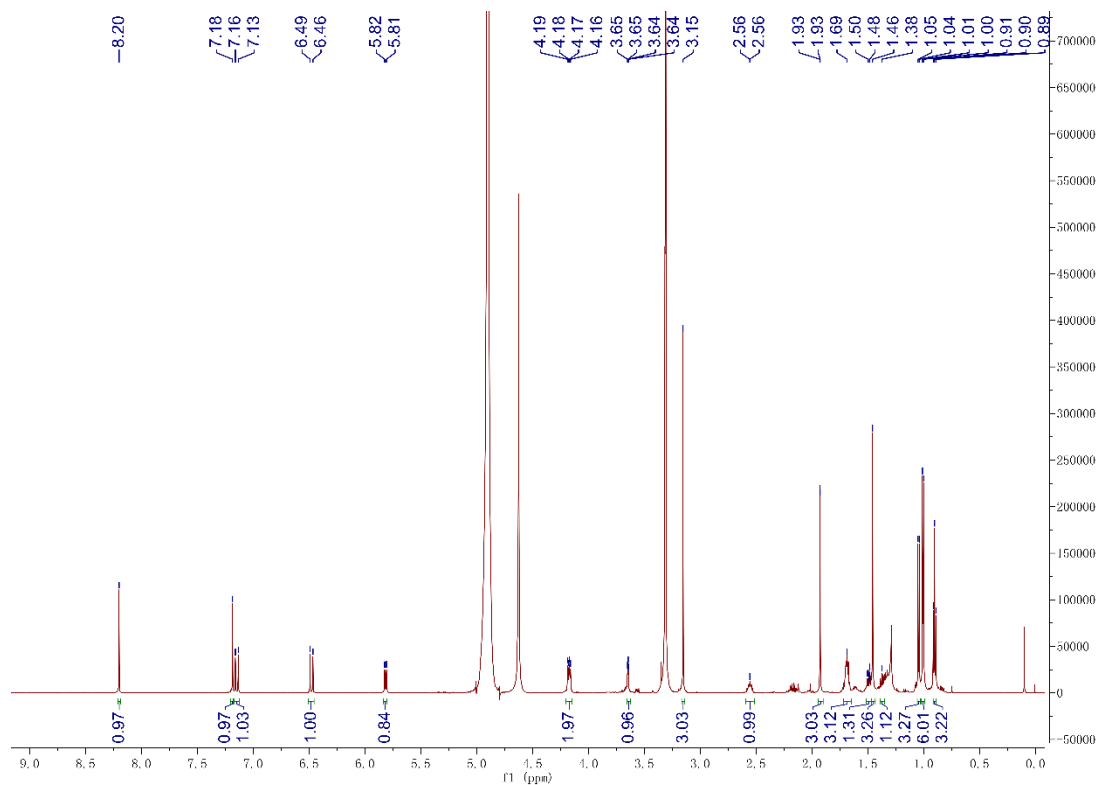

Figure S8.  $^1\text{H}$  NMR (600 MHz,  $\text{CD}_3\text{OD}$ ) spectrum of compound 2

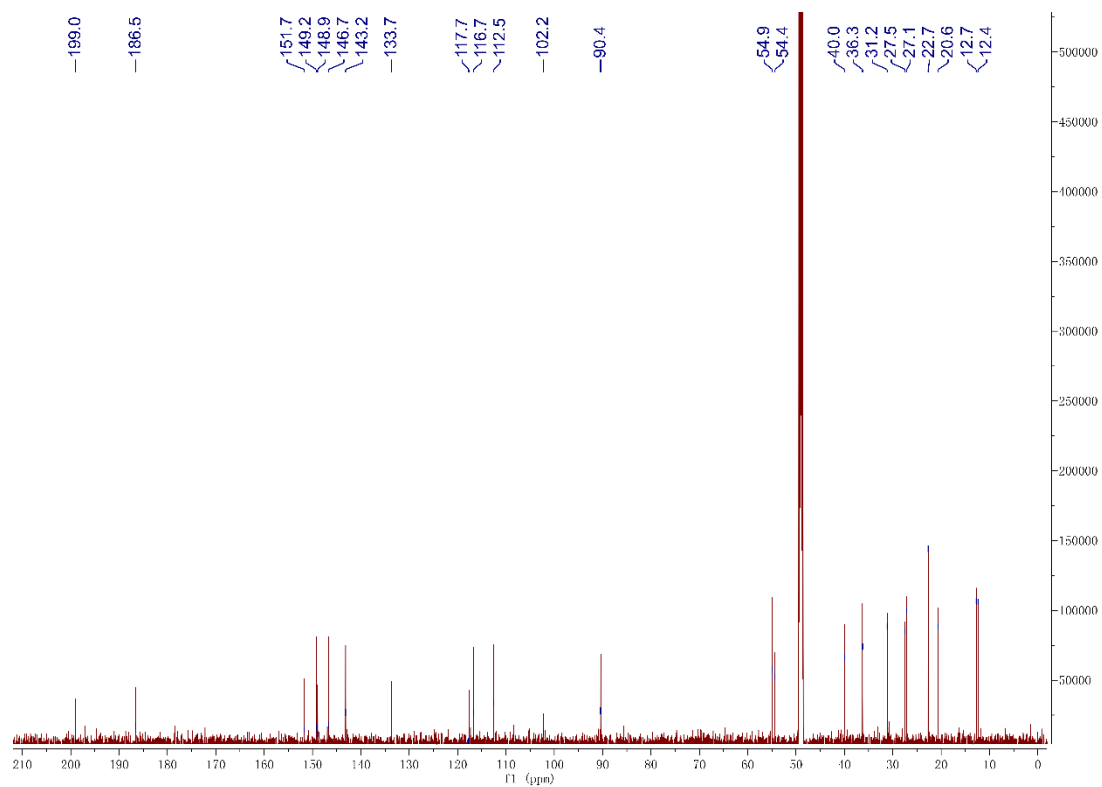

**Figure S9.**  $^{13}\text{C}$  NMR (150 MHz,  $\text{CD}_3\text{OD}$ ) spectrum of compound **2**

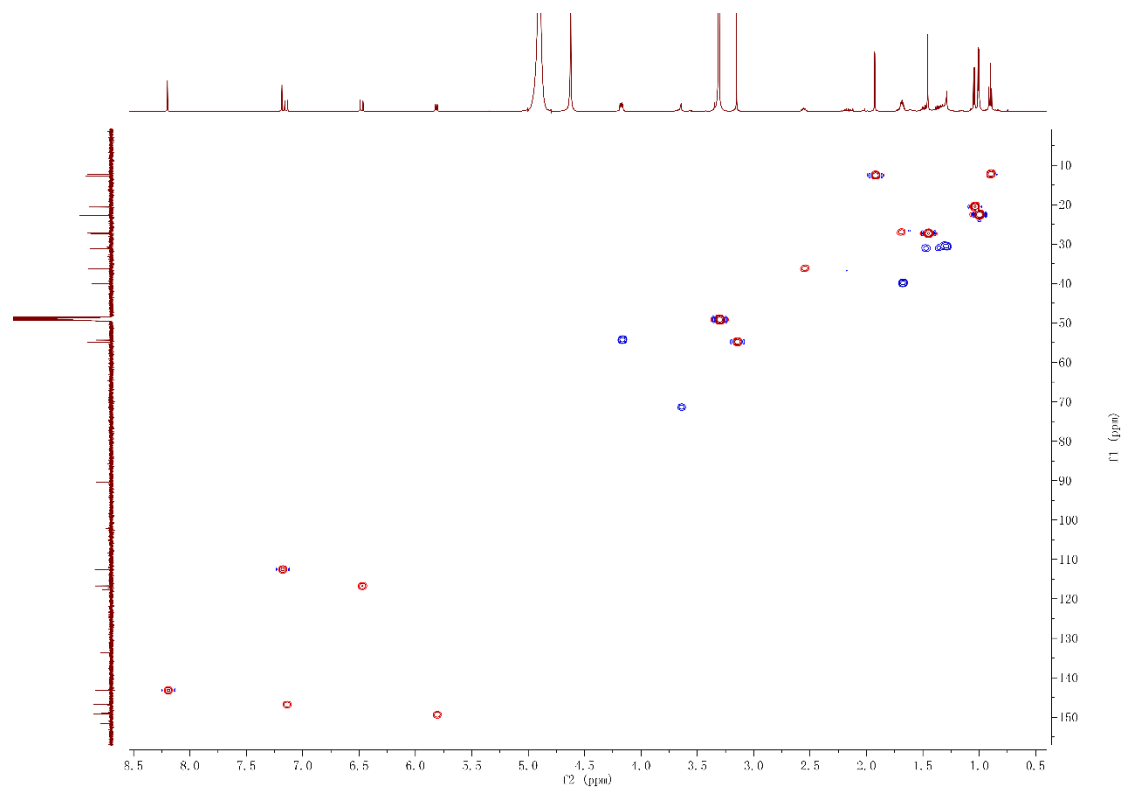

**Figure S10.** HMQC ( $\text{CD}_3\text{OD}$ ) spectrum of compound **2**

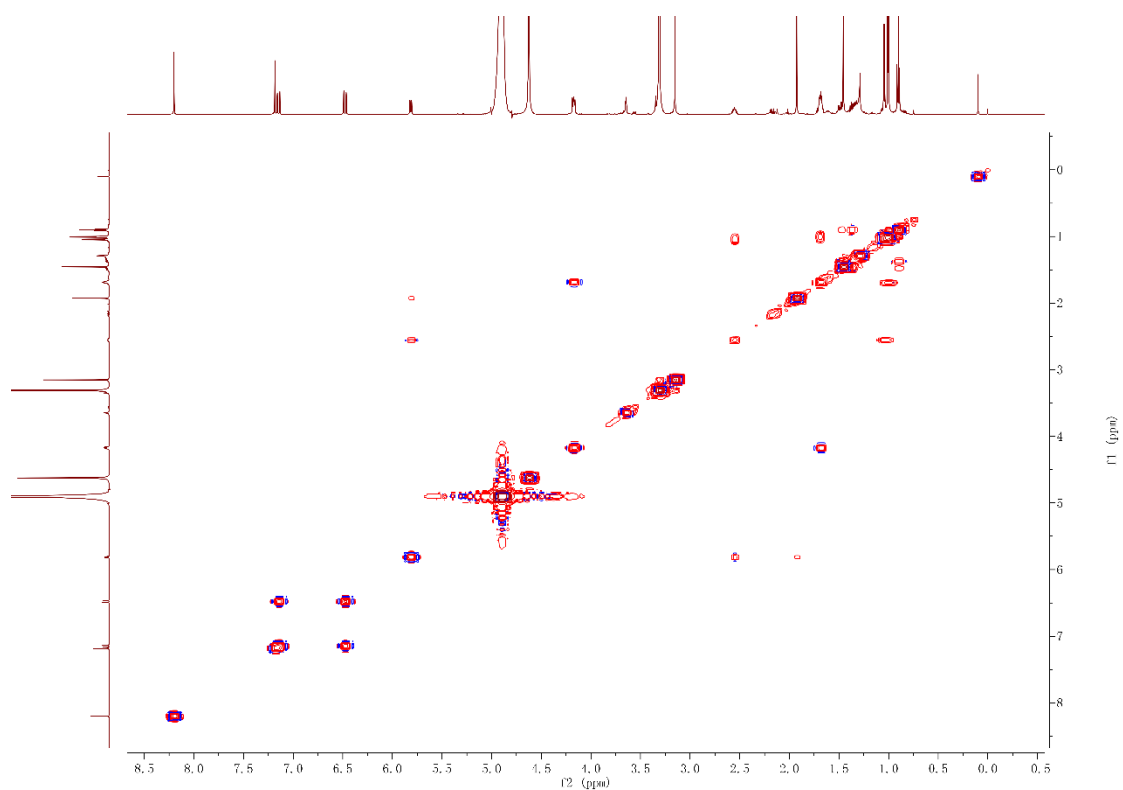

**Figure S11.**  $^1\text{H}$ - $^1\text{H}$  COSY ( $\text{CD}_3\text{OD}$ ) spectrum of compound **2**

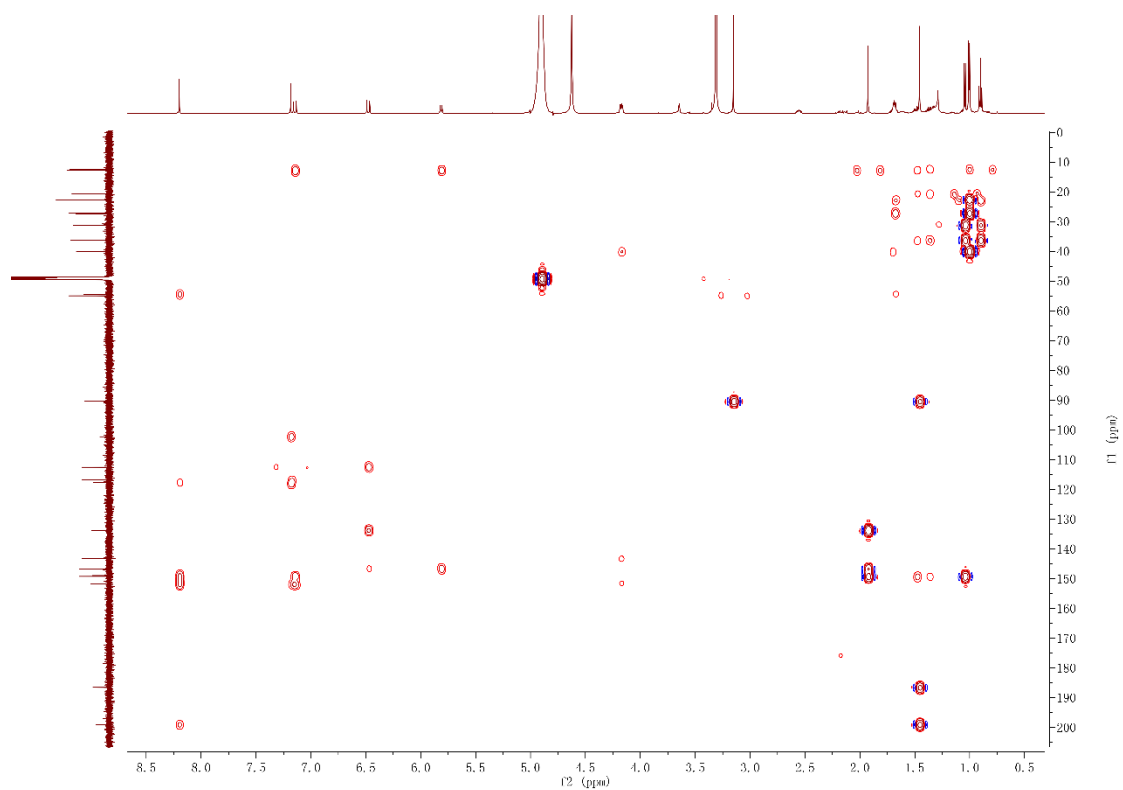

**Figure S12.** HMBC ( $\text{CD}_3\text{OD}$ ) spectrum of compound **2**

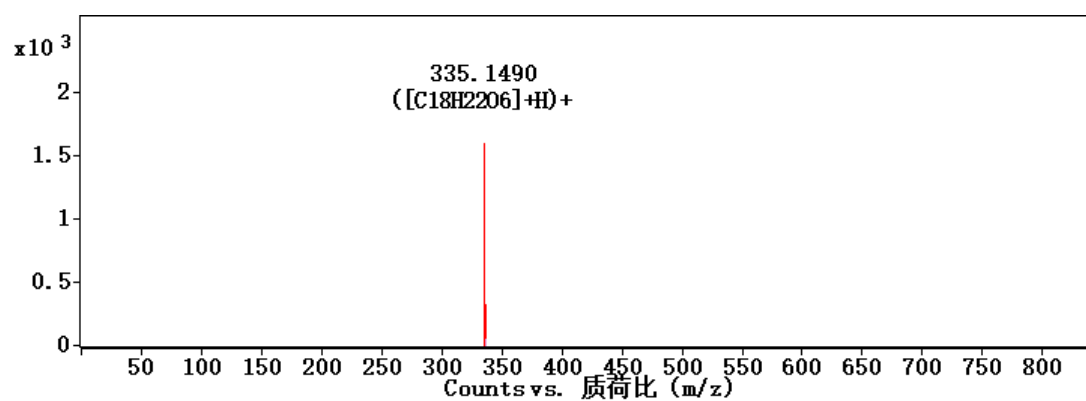

Figure S13. HR-ESI-MS spectrum of compound 7

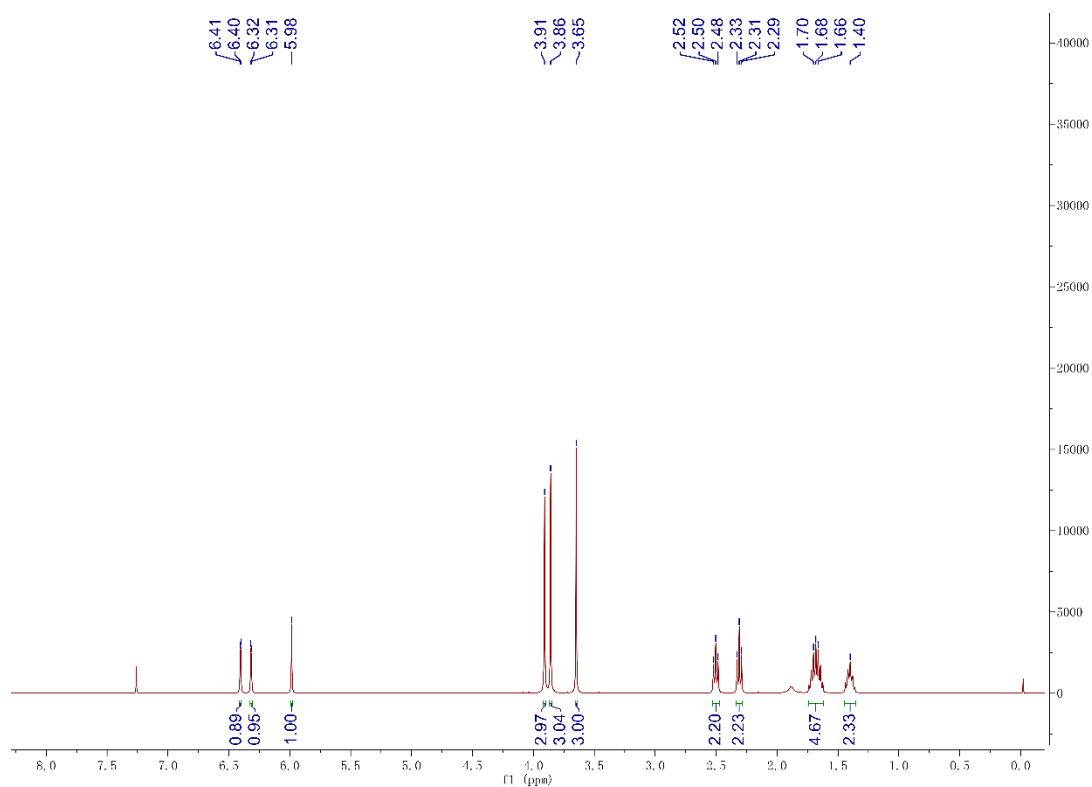

Figure S14.  $^1H$  NMR (400 MHz,  $CDCl_3$ ) spectrum of compound 7

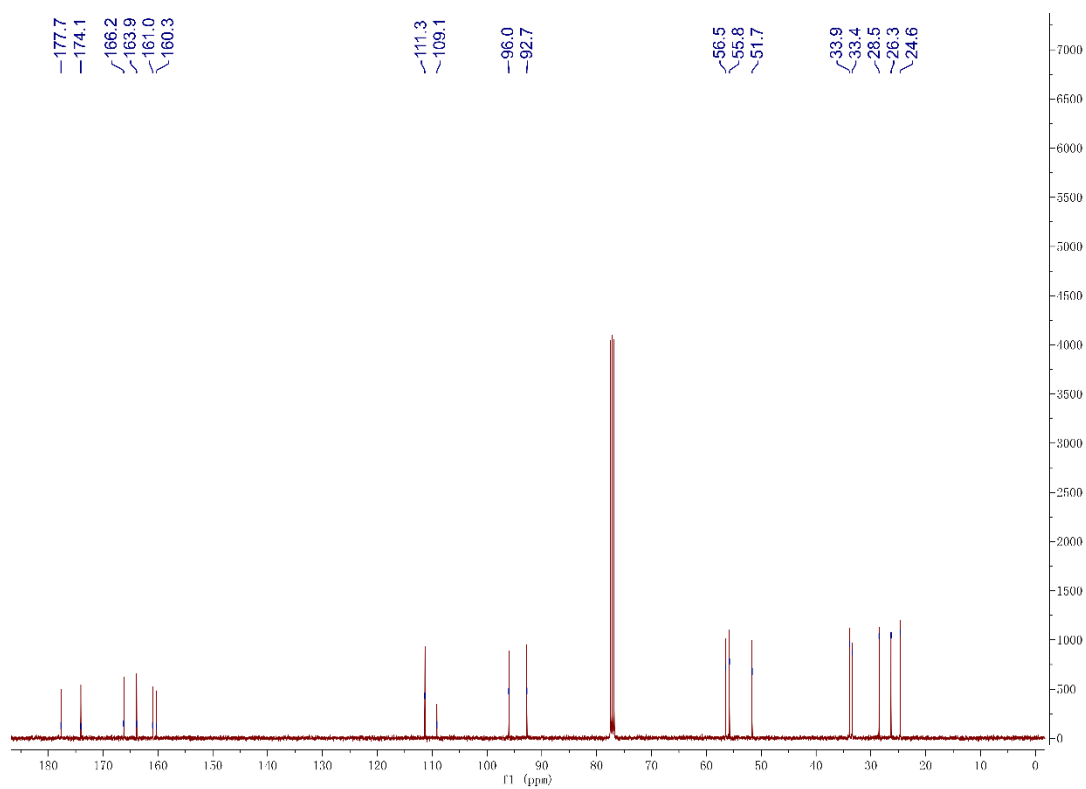

**Figure S15.**  $^{13}\text{C}$  NMR (100 MHz,  $\text{CDCl}_3$ ) spectrum of compound **7**

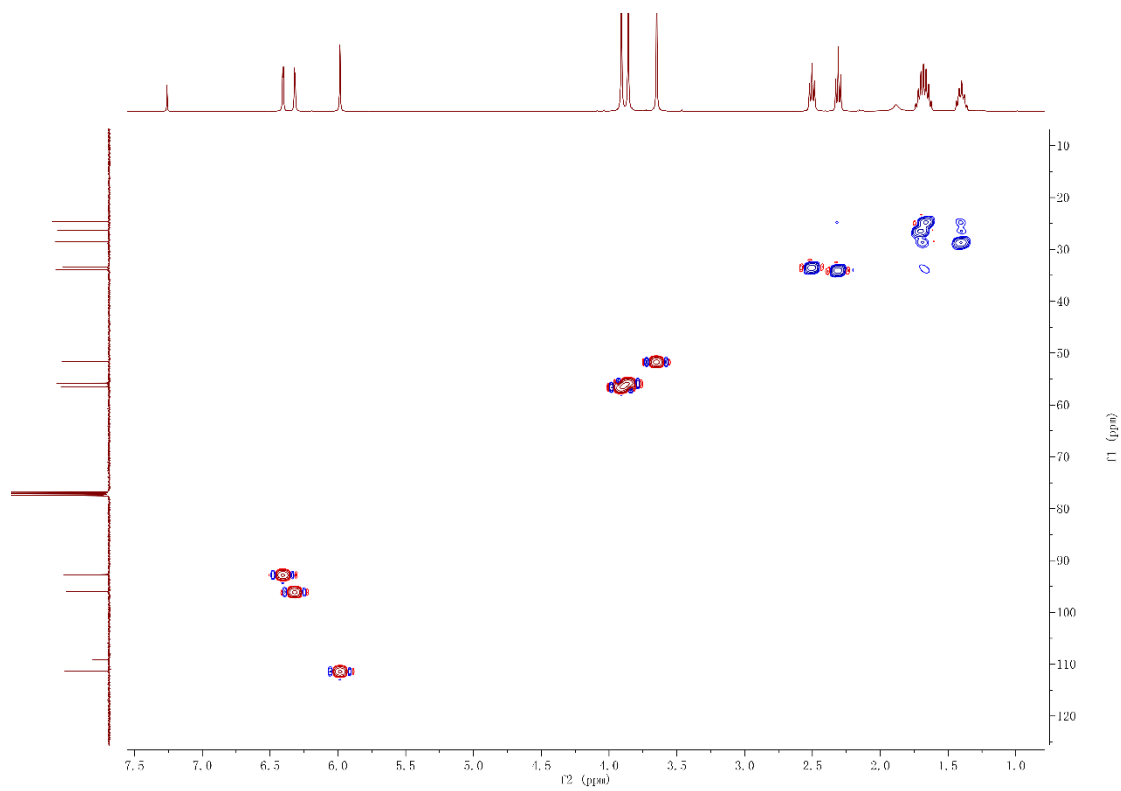

**Figure S16.** HMQC ( $\text{CDCl}_3$ ) spectrum of compound **7**

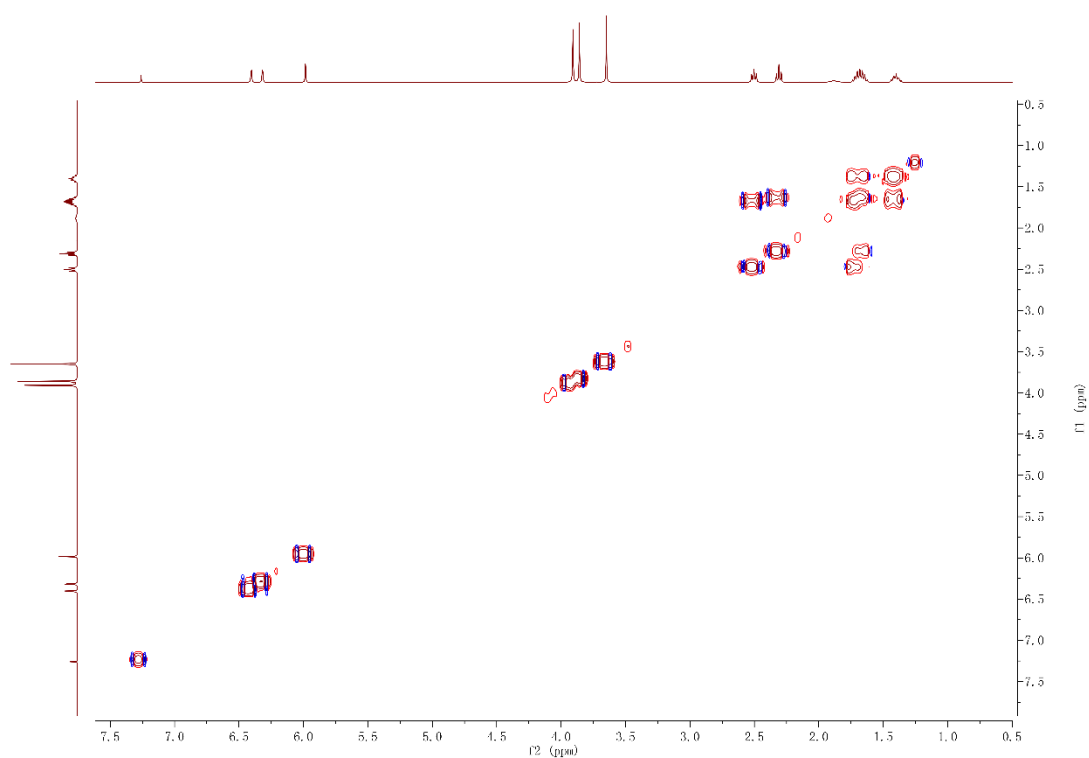

**Figure S17.**  $^1\text{H}$ - $^1\text{H}$  COSY ( $\text{CDCl}_3$ ) spectrum of compound **7**

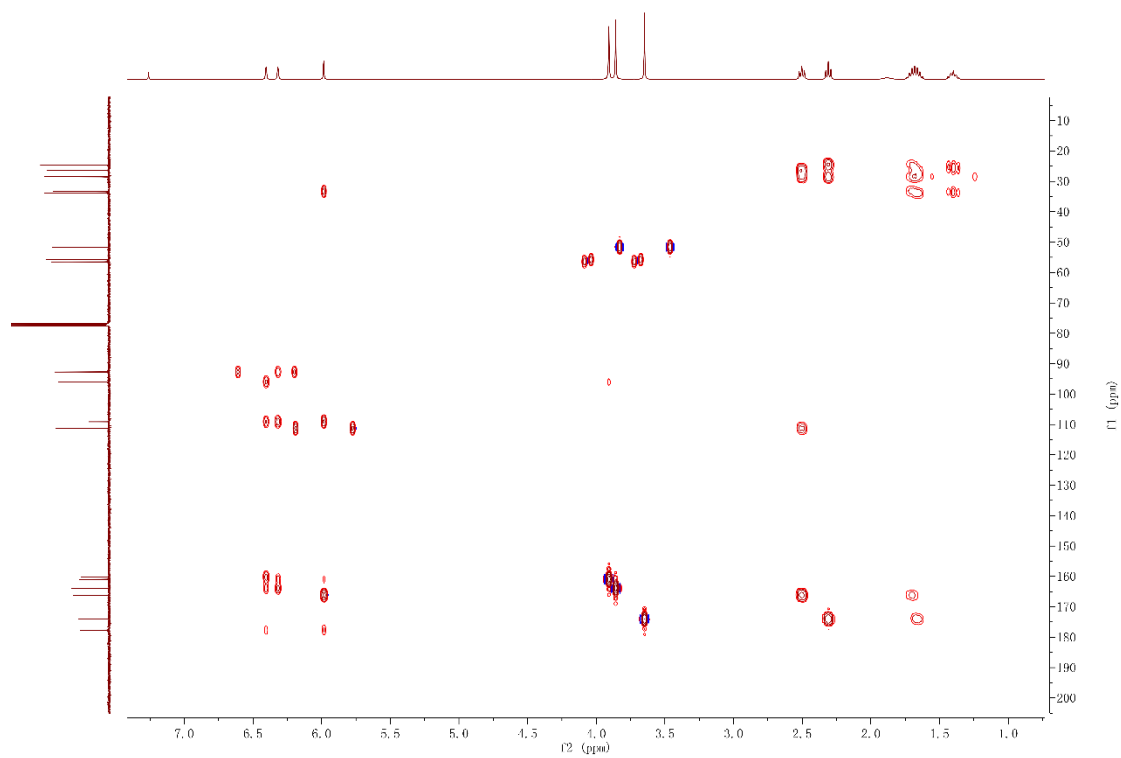

**Figure S18.** HMBC ( $\text{CDCl}_3$ ) spectrum of compound **7**

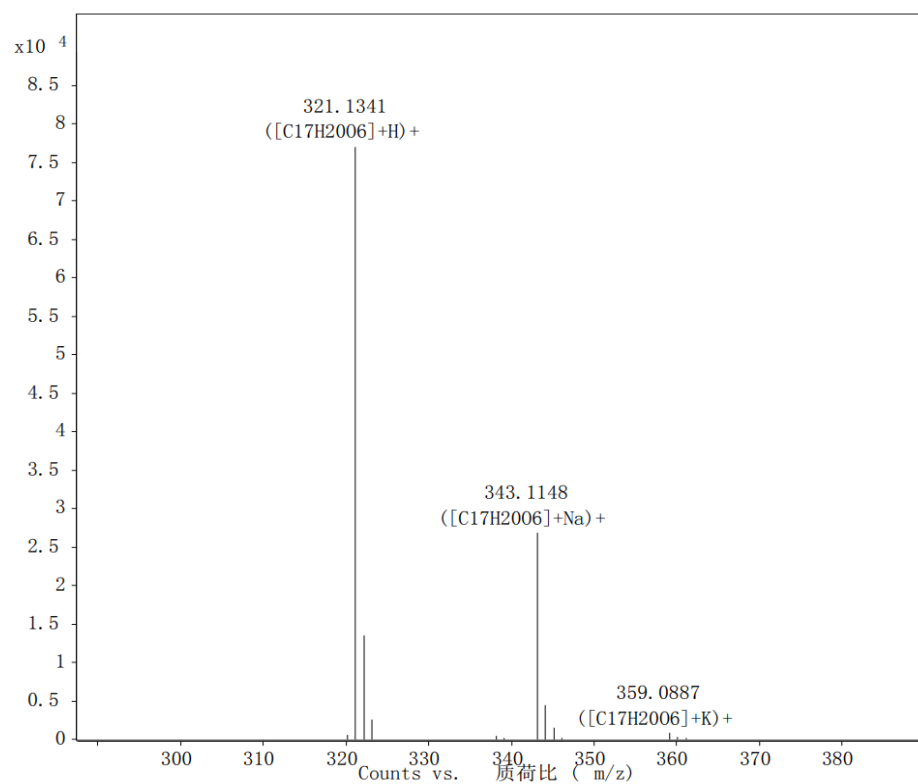

**Figure S19.** HR-ESI-MS spectrum of compound **8**

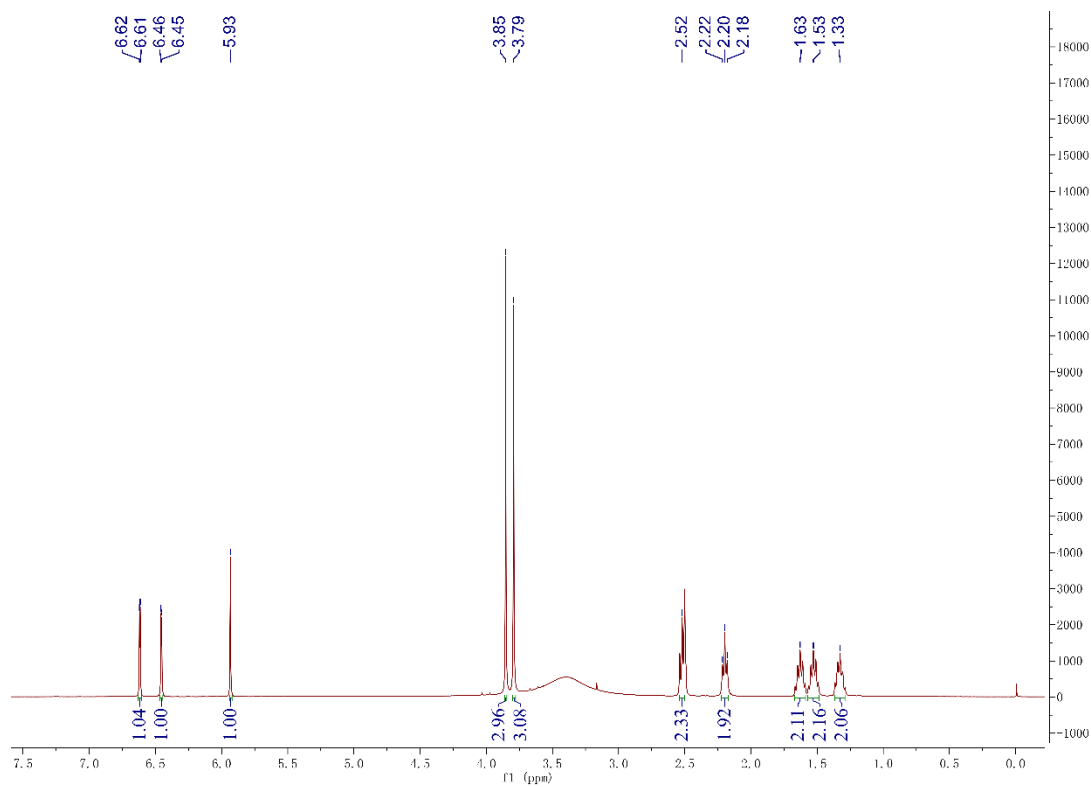

**Figure S20.**  $^1\text{H}$  NMR (400 MHz,  $\text{DMSO}-d_6$ ) spectrum of compound **8**

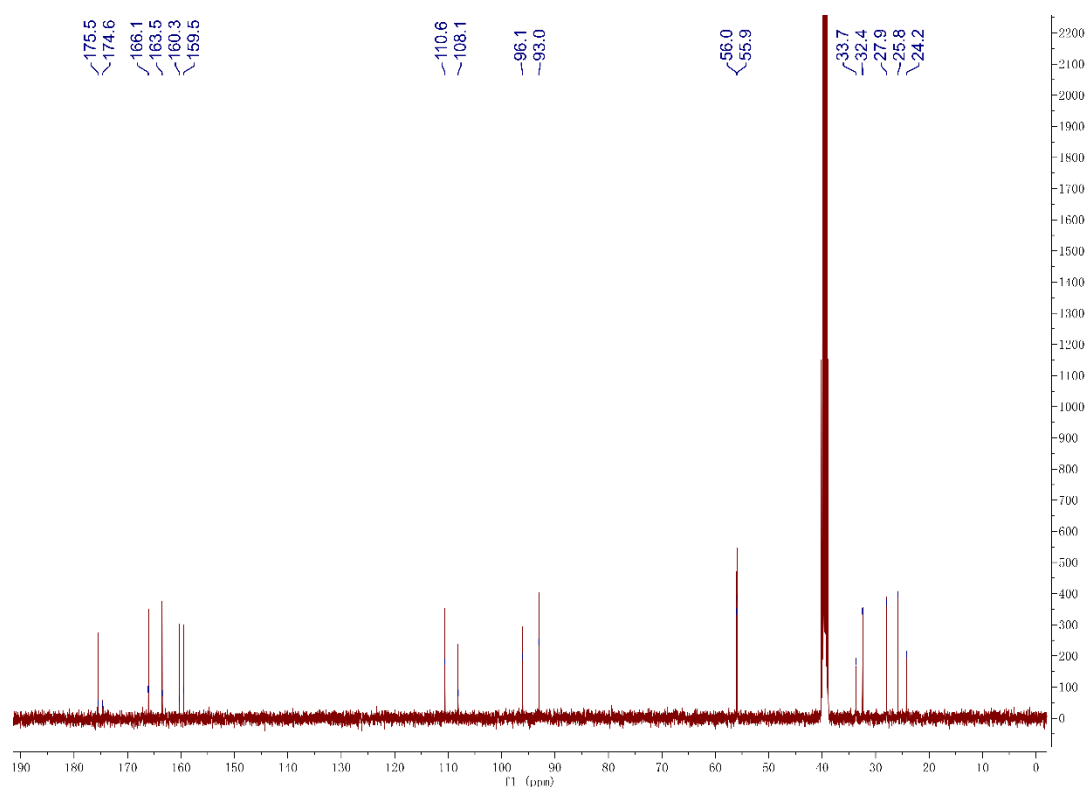

**Figure S21.**  $^{13}\text{C}$  NMR (100 MHz,  $\text{DMSO}-d_6$ ) spectrum of compound **8**

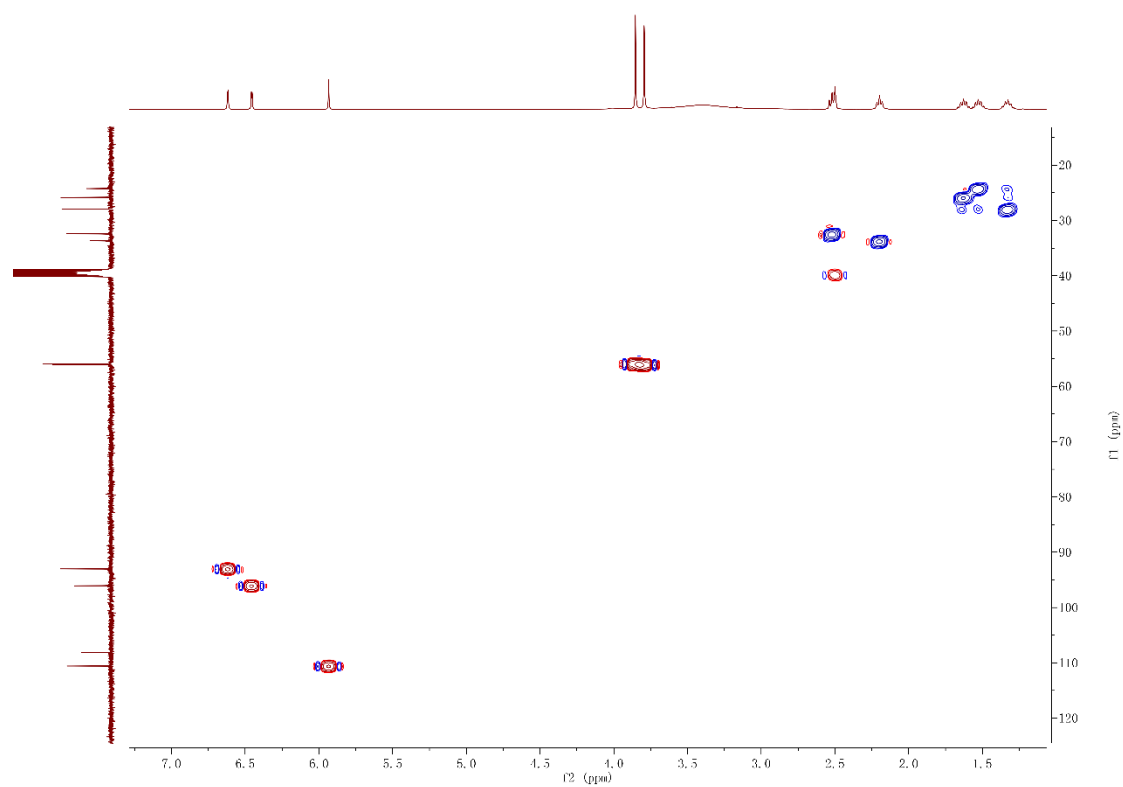

**Figure S22.** HMQC ( $\text{DMSO}-d_6$ ) spectrum of compound **8**



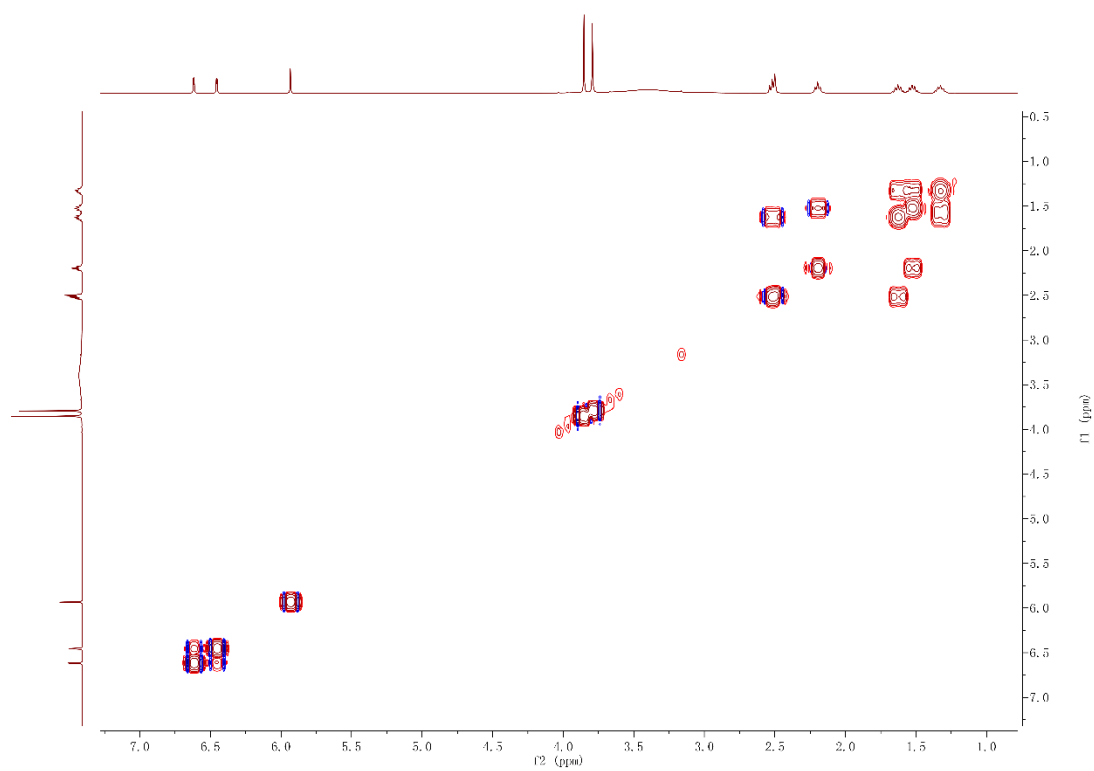

**Figure S23.**  $^1\text{H}$ - $^1\text{H}$  COSY (DMSO- $d_6$ ) spectrum of compound **8**

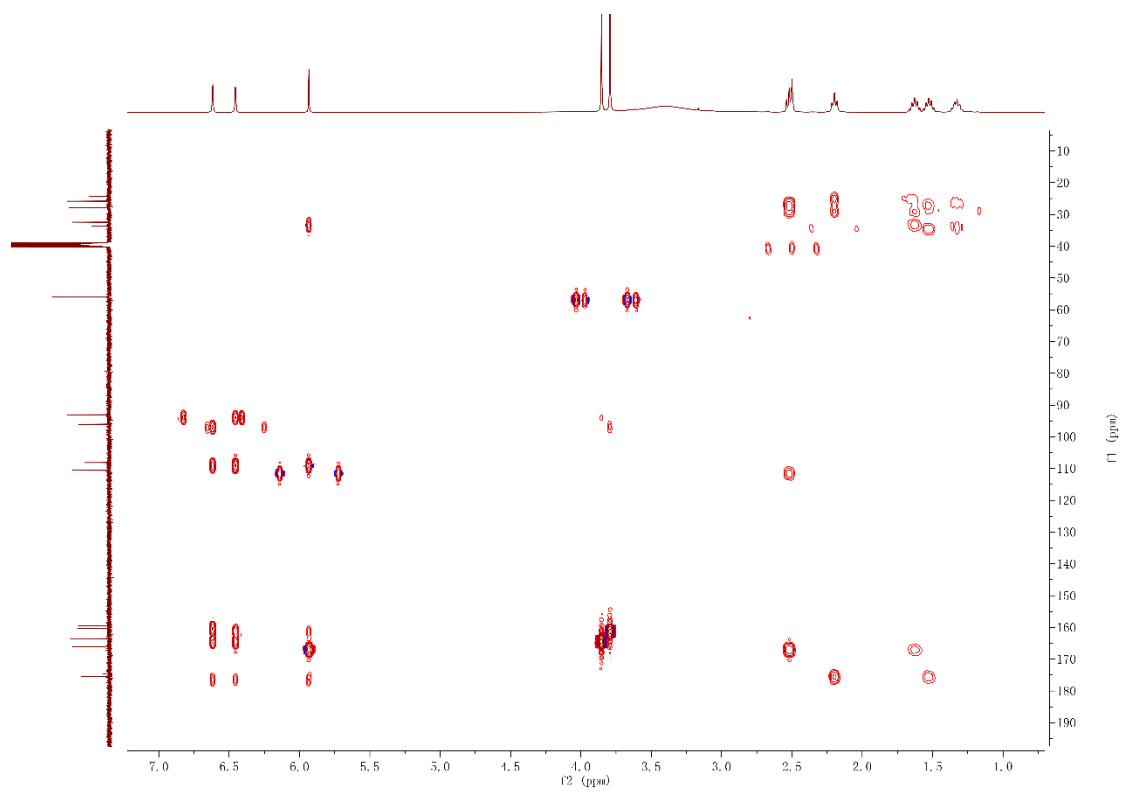

**Figure S24.** HMBC (DMSO- $d_6$ ) spectrum of compound **8**
